# Supplementary material
Source: publisher figshare collection journal article supplement (https://gsajournals.figshare.com/articles/dataset/_/5965285)
Supplement: Supplementary file 1 [file 1]

**Table S1:** Number of raw reads (in million) obtained for each biological replicate and numbers and percentages of reads that passed the different filtering steps: trimming, mapping and counting. R1 and R2 refer to forward and reverse sequencing of the reads.

| <b>Samples</b> | <b>Raw reads</b> | <b>Trimmed reads</b> | <b>Mapped reads</b> | <b>Assigned reads</b> |
|----------------|------------------|----------------------|---------------------|-----------------------|
| <b>Female1</b> | R1: 76.24        | 75.50 (99.02%)       | 69.66 (92.26%)      | 61.46 (86.5%)         |
|                | R2: 76.24        |                      |                     |                       |
| <b>Female2</b> | R1: 64.59        | 64.00 (99.07%)       | 58.89 (92.01%)      | 52.85 (88.2%)         |
|                | R2: 64.59        |                      |                     |                       |
| <b>Female3</b> | R1: 68.13        | 67.46 (99.02%)       | 62.33 (92.39%)      | 55.36 (87.1%)         |
|                | R2: 68.13        |                      |                     |                       |
| <b>Female4</b> | R1: 73.42        | 72.75 (99.10%)       | 67.37 (92.61%)      | 59.14 (86.1%)         |
|                | R2: 73.42        |                      |                     |                       |
| <b>Male1</b>   | R1: 138.22       | 137.20 (99.26%)      | 128.21 (93.45%)     | 110.56 (84.4%)        |
|                | R2: 138.22       |                      |                     |                       |
| <b>Male2</b>   | R1: 126.44       | 125.57 (99.31%)      | 117.96 (93.94%)     | 102.48 (85.0%)        |
|                | R2: 126.44       |                      |                     |                       |
| <b>Male3</b>   | R1: 143.63       | 142.39 (99.13%)      | 133.41 (93.7%)      | 116.50 (85.8%)        |
|                | R2: 143.63       |                      |                     |                       |
| <b>Male4</b>   | R1: 106.43       | 104.50 (98.19%)      | 980.83 (93.86%)     | 83.73 (83.1%)         |
|                | R2: 106.43       |                      |                     |                       |
